# Supplementary material for: In vitro gastrointestinal digestion study of a novel bio-tofu with special emphasis on the impact of microbial transglutaminase
Source: PeerJ. 2016 Dec 15;4:e2754. doi: 10.7717/peerj.2754 (PMC5162802; doi:10.7717/peerj.2754)
Supplement: Data S1 [file peerj-04-2754-s001.xlsx]

## Sheet: The particle size distribution
The particle size distribution of the BT-with MTGase and BT-without MTGase before and after in vitro gastrointestinal digestion
BT-without MTGase
P0			P1			P2-60			P3-120
Size grading	volume density (%)		Size grading	volume density (%)		Size grading	volume density (%)		Size grading	volume density (%)
0.0106591	0		0.0106591	0		0.0106591	0		0.0106591	0
0.0121105	0		0.0121105	0		0.0121105	0		0.0121105	0
0.0137595	0		0.0137595	0		0.0137595	0		0.0137595	0
0.015633	0		0.015633	0		0.015633	0		0.015633	0
0.0177616	0		0.0177616	0		0.0177616	0		0.0177616	0
0.0201801	0		0.0201801	0		0.0201801	0		0.0201801	0
0.0229279	0		0.0229279	0		0.0229279	0		0.0229279	0
0.0260498	0		0.0260498	0		0.0260498	0		0.0260498	0
0.0295969	0		0.0295969	0		0.0295969	0		0.0295969	0
0.0336269	0		0.0336269	0		0.0336269	0		0.0336269	0
0.0382056	0		0.0382056	0		0.0382056	0		0.0382056	0
0.0434078	0		0.0434078	0		0.0434078	0		0.0434078	0
0.0493183	0		0.0493183	0		0.0493183	0		0.0493183	0
0.0560337	0		0.0560337	0		0.0560337	0		0.0560337	0
0.0636634	0		0.0636634	0		0.0636634	0		0.0636634	0
0.072332	0		0.072332	0		0.072332	0		0.072332	0
0.082181	0		0.082181	0		0.082181	0		0.082181	0
0.093371	0		0.093371	0		0.093371	0		0.093371	0
0.106085	0		0.106085	0		0.106085	0		0.106085	0
0.120529	0		0.120529	0		0.120529	0		0.120529	0
0.136941	0		0.136941	0		0.136941	0		0.136941	0
0.155587	0		0.155587	0		0.155587	0		0.155587	0
0.176773	0		0.176773	0		0.176773	0		0.176773	0
0.200843	0		0.200843	0		0.200843	0		0.200843	0
0.22819	0		0.22819	0		0.22819	0		0.22819	0
0.259261	0		0.259261	0		0.259261	0		0.259261	0
0.294563	0		0.294563	0		0.294563	0		0.294563	0
0.334671	0		0.334671	0		0.334671	0		0.334671	0
0.380241	0		0.380241	0		0.380241	0		0.380241	0
0.432016	0		0.432016	0		0.432016	0		0.432016	0
0.490841	0		0.490841	0		0.490841	0		0.490841	0
0.557675	0		0.557675	0		0.557675	7.66632e-05		0.557675	0.000191761
0.63361	0		0.63361	0		0.63361	0.036471		0.63361	0.0734
0.719884	0		0.719884	0		0.719884	0.535675		0.719884	1.03446
0.817906	0		0.817906	0		0.817906	2.20702		0.817906	3.933
0.929275	0		0.929275	0		0.929275	4.66793		0.929275	8.11261
1.05581	0		1.05581	0		1.05581	6.82811		1.05581	11.9337
1.19957	0		1.19957	0		1.19957	7.61563		1.19957	13.8641
1.36291	0		1.36291	0		1.36291	6.63528		1.36291	13.3474
1.54848	0		1.54848	0		1.54848	4.42554		1.54848	11.0226
1.75933	0		1.75933	0		1.75933	2.10188		1.75933	8.18399
1.99889	0		1.99889	0		1.99889	0.586274		1.99889	5.89122
2.27106	0		2.27106	0		2.27106	0.0439589		2.27106	4.40951
2.5803	0		2.5803	0		2.5803	0.0130384		2.5803	3.4156
2.93164	0		2.93164	0		2.93164	0.156369		2.93164	2.60708
3.33082	0		3.33082	0		3.33082	0.482222		3.33082	1.94643
3.78435	7.86453e-05		3.78435	0		3.78435	0.955629		3.78435	1.41994
4.29964	0.00724752		4.29964	0		4.29964	1.49227		4.29964	0.98269
4.88509	0.103733		4.88509	0.000229073		4.88509	2.05577		4.88509	0.68885
5.55026	0.489925		5.55026	0.0163089		5.55026	2.61997		5.55026	0.61854
6.30601	1.13944		6.30601	0.168158		6.30601	3.14787		6.30601	0.78144
7.16465	1.97734		7.16465	0.33671		7.16465	3.6689		7.16465	1.24007
8.14021	3.00268		8.14021	0.585933		8.14021	4.16473		8.14021	1.89773
9.24861	4.28728		9.24861	1.00301		9.24861	4.58017		9.24861	2.53226
10.5079	5.87882		10.5079	1.66112		10.5079	4.85338		10.5079	2.90477
11.9387	7.66562		11.9387	2.54792		11.9387	4.93368		11.9387	2.8513
13.5643	9.34234		13.5643	3.54804		13.5643	4.84802		13.5643	2.42477
15.4113	10.5333		15.4113	4.5054		15.4113	4.69854		15.4113	1.86979
17.5097	11.003		17.5097	5.31862		17.5097	4.56145		17.5097	1.38588
19.8939	10.7485		19.8939	5.97113		19.8939	4.41698		19.8939	0.97003
22.6027	9.89426		22.6027	6.48062		22.6027	4.22895		22.6027	0.58181
25.6804	8.58475		25.6804	6.85894		25.6804	4.01726		25.6804	0.29516
29.1771	7.01036		29.1771	7.11749		29.1771	3.79178		29.1771	0.15415
33.15	5.39074		33.15	7.2676		33.15	3.53503		33.15	0.12826
37.6638	3.9113		37.6638	7.31402		37.6638	3.25008		37.6638	0.21117
42.7922	2.70599		42.7922	7.2511		42.7922	2.93297		42.7922	0.36301
48.6189	1.84486		48.6189	7.07082		48.6189	2.58522		48.6189	0.54247
55.239	1.3253		55.239	6.76541		55.239	2.21291		55.239	0.70724
62.7605	1.09043		62.7605	6.33357		62.7605	1.8277		62.7605	0.82435
71.3062	1.05199		71.3062	5.78465		71.3062	1.44577		71.3062	0.87393
81.0155	1.1125		81.0155	5.14112		81.0155	1.086		81.0155	0.85068
92.0468	1.18804		92.0468	4.43835		92.0468	0.765875		92.0468	0.7598
104.58	1.22396		104.58	3.72117		104.58	0.498182		104.58	0.61409
118.82	1.20042		118.82	3.0372		118.82	0.288795		118.82	0.43476
134.999	1.12487		134.999	2.42746		134.999	0.135243		134.999	0.24221
153.381	1.02037		153.381	1.91772		153.381	0.0132077		153.381	0.02158
174.266	0.910372		174.266	1.51352		174.266	0.000208823		174.266	0.000103545
197.994	0.807608		197.994	1.20072		197.994	0		197.994	0
224.954	0.710783		224.954	0.952221		224.954	0		224.954	0
255.584	0.608883		255.584	0.736872		255.584	0		255.584	0
290.385	0.489735		290.385	0.524666		290.385	0		290.385	0
329.925	0.348743		329.925	0.311739		329.925	0		329.925	0
374.849	0.192429		374.849	0.108492		374.849	0		374.849	0
425.889	0.0196385		425.889	0.00979786		425.889	0		425.889	0
483.88	0.000337136		483.88	0.000157383		483.88	0		483.88	0
549.766	0		549.766	0		549.766	0		549.766	0
624.624	0		624.624	0		624.624	0		624.624	0
709.675	0		709.675	0		709.675	0		709.675	0
806.307	0		806.307	0		806.307	0		806.307	0
916.096	0		916.096	0		916.096	0		916.096	0
1040.83	0		1040.83	0		1040.83	0		1040.83	0
1182.56	0		1182.56	0		1182.56	0		1182.56	0
1343.58	0		1343.58	0		1343.58	0		1343.58	0
1526.52	0		1526.52	0		1526.52	0		1526.52	0
1734.38	0		1734.38	0		1734.38	0		1734.38	0
1970.54	0		1970.54	0		1970.54	0		1970.54	0
2238.85	0		2238.85	0		2238.85	0		2238.85	0
2543.7	0		2543.7	0		2543.7	0		2543.7	0
2890.06	0		2890.06	0		2890.06	0		2890.06	0
3283.58	0		3283.58	0		3283.58	0		3283.58	0
BT-with MTGase
P0			P1			P2-60			P3-120
Size grading	volume density (%)		Size grading	volume density (%)		Size grading	volume density (%)		Size grading	volume density (%)
0.0106591	0		0.0106591	0		0.0106591	0		0.0106591	0
0.0121105	0		0.0121105	0		0.0121105	0		0.0121105	0
0.0137595	0		0.0137595	0		0.0137595	0		0.0137595	0
0.015633	0		0.015633	0		0.015633	0		0.015633	0
0.0177616	0		0.0177616	0		0.0177616	0		0.0177616	0
0.0201801	0		0.0201801	0		0.0201801	0		0.0201801	0
0.0229279	0		0.0229279	0		0.0229279	0		0.0229279	0
0.0260498	0		0.0260498	0		0.0260498	0		0.0260498	0
0.0295969	0		0.0295969	0		0.0295969	0		0.0295969	0
0.0336269	0		0.0336269	0		0.0336269	0		0.0336269	0
0.0382056	0		0.0382056	0		0.0382056	0		0.0382056	0
0.0434078	0		0.0434078	0		0.0434078	0		0.0434078	0
0.0493183	0		0.0493183	0		0.0493183	0		0.0493183	0
0.0560337	0		0.0560337	0		0.0560337	0		0.0560337	0
0.0636634	0		0.0636634	0		0.0636634	0		0.0636634	0
0.072332	0		0.072332	0		0.072332	0		0.072332	0
0.082181	0		0.082181	0		0.082181	0		0.082181	0
0.093371	0		0.093371	0		0.093371	0		0.093371	0
0.106085	0		0.106085	0		0.106085	0		0.106085	0
0.120529	0		0.120529	0		0.120529	0		0.120529	0
0.136941	0		0.136941	0		0.136941	0		0.136941	0
0.155587	0		0.155587	0		0.155587	0		0.155587	0
0.176773	0		0.176773	0		0.176773	0		0.176773	0
0.200843	0		0.200843	0		0.200843	0		0.200843	0
0.22819	0		0.22819	0		0.22819	0		0.22819	0
0.259261	0		0.259261	0		0.259261	0		0.259261	0
0.294563	0		0.294563	0		0.294563	0		0.294563	0
0.334671	0		0.334671	0		0.334671	0		0.334671	0
0.380241	0		0.380241	0		0.380241	0		0.380241	0
0.432016	0		0.432016	0		0.432016	0		0.432016	0
0.490841	0		0.490841	0		0.490841	0		0.490841	0
0.557675	0		0.557675	0		0.557675	0		0.557675	2.52e-05
0.63361	0		0.63361	0		0.63361	0.000565229		0.63361	0.06594
0.719884	0		0.719884	0		0.719884	0.13196		0.719884	0.99157
0.817906	0		0.817906	0		0.817906	1.61179		0.817906	4.14214
0.929275	0		0.929275	0		0.929275	4.14796		0.929275	8.8374
1.05581	0		1.05581	0		1.05581	6.66714		1.05581	13.0965
1.19957	0		1.19957	0		1.19957	7.98618		1.19957	14.8962
1.36291	0		1.36291	0		1.36291	7.55997		1.36291	13.4786
1.54848	0		1.54848	0		1.54848	5.80521		1.54848	9.76779
1.75933	0		1.75933	0		1.75933	3.76414		1.75933	5.73685
1.99889	0		1.99889	0		1.99889	2.35546		1.99889	3.01944
2.27106	0		2.27106	0		2.27106	1.82441		2.27106	1.91833
2.5803	0		2.5803	0		2.5803	1.86103		2.5803	1.70294
2.93164	0		2.93164	0		2.93164	2.15168		2.93164	1.71684
3.33082	0		3.33082	0		3.33082	2.59275		3.33082	1.78962
3.78435	0		3.78435	0		3.78435	3.08396		3.78435	1.81569
4.29964	0		4.29964	0		4.29964	3.51686		4.29964	1.70816
4.88509	0.000191401		4.88509	0		4.88509	3.86119		4.88509	1.54053
5.55026	0.0137058		5.55026	0.000142914		5.55026	4.11122		5.55026	1.42326
6.30601	0.14281		6.30601	0.00984612		6.30601	4.24935		6.30601	1.41173
7.16465	0.301483		7.16465	0.0974824		7.16465	4.32587		7.16465	1.62092
8.14021	0.550998		8.14021	0.159713		8.14021	4.33593		8.14021	2.0024
9.24861	0.971666		9.24861	0.26005		9.24861	4.23319		9.24861	2.38777
10.5079	1.62495		10.5079	0.435422		10.5079	3.9666		10.5079	2.58722
11.9387	2.48801		11.9387	0.685045		11.9387	3.50239		11.9387	2.4625
13.5643	3.43865		13.5643	0.967433		13.5643	2.89581		13.5643	2.06387
15.4113	4.31321		15.4113	1.22849		15.4113	2.28385		15.4113	1.60639
17.5097	4.99734		17.5097	1.44391		17.5097	1.77166		17.5097	1.25497
19.8939	5.46027		19.8939	1.63086		19.8939	1.35653		19.8939	0.98592
22.6027	5.71293		22.6027	1.82212		22.6027	1.01337		22.6027	0.74298
25.6804	5.77097		25.6804	2.04568		25.6804	0.77198		25.6804	0.57667
29.1771	5.66449		29.1771	2.32446		29.1771	0.6464		29.1771	0.51846
33.15	5.43983		33.15	2.67277		33.15	0.61515		33.15	0.5398
37.6638	5.14478		37.6638	3.09283		37.6638	0.67014		37.6638	0.63873
42.7922	4.82458		42.7922	3.56967		42.7922	0.78697		42.7922	0.78449
48.6189	4.51737		48.6189	4.0772		48.6189	0.93738		48.6189	0.94517
55.239	4.251		55.239	4.57879		55.239	1.08969		55.239	1.08681
62.7605	4.04148		62.7605	5.03482		62.7605	1.21455		62.7605	1.185
71.3062	3.89364		71.3062	5.40864		71.3062	1.28883		71.3062	1.22873
81.0155	3.80376		81.0155	5.67219		81.0155	1.29834		81.0155	1.21823
92.0468	3.76334		92.0468	5.81092		92.0468	1.23882		92.0468	1.15646
104.58	3.76249		104.58	5.82685		104.58	1.11774		104.58	1.04346
118.82	3.79139		118.82	5.73916		118.82	0.95667		118.82	0.87879
134.999	3.83897		134.999	5.58061		134.999	0.79216		134.999	0.67222
153.381	3.88943		153.381	5.39155		153.381	0.66792		153.381	0.44625
174.266	3.91847		174.266	5.21079		174.266	0.62583		174.266	0.23093
197.994	3.89131		197.994	5.06531		197.994	0.69054		197.994	0.02307
224.954	3.76501		224.954	4.96105		224.954	0.85362		224.954	0.000375
255.584	3.49612		255.584	4.87733		255.584	1.06388		255.584	0
290.385	3.05424		290.385	4.76763		290.385	1.23816		290.385	0
329.925	2.4412		329.925	4.56957		329.925	1.29542		329.925	0
374.849	1.71307		374.849	4.22378		374.849	1.19553		374.849	0
425.889	0.966531		425.889	3.69458		425.889	0.95443		425.889	0
483.88	0.266144		483.88	2.98747		483.88	0.6346		483.88	0
549.766	0.021851		549.766	2.16188		549.766	0.30826		549.766	0
624.624	0.000334376		624.624	1.31717		624.624	0.02685		624.624	0
709.675	0		709.675	0.503604		709.675	0.000137929		709.675	0
806.307	0		806.307	0.0410346		806.307	0		806.307	0
916.096	0		916.096	0.000174139		916.096	0		916.096	0
1040.83	0		1040.83	0		1040.83	0		1040.83	0
1182.56	0		1182.56	0		1182.56	0		1182.56	0
1343.58	0		1343.58	0		1343.58	0		1343.58	0
1526.52	0		1526.52	0		1526.52	0		1526.52	0
1734.38	0		1734.38	0		1734.38	0		1734.38	0
1970.54	0		1970.54	0		1970.54	0		1970.54	0
2238.85	0		2238.85	0		2238.85	0		2238.85	0
2543.7	0		2543.7	0		2543.7	0		2543.7	0
2890.06	0		2890.06	0		2890.06	0		2890.06	0
3283.58	0		3283.58	0		3283.58	0		3283.58	0

## Sheet: The soluble protein content
The soluble protein content of the mixed protein samples
The standand curve	y=0.0079x+0.0405 R2=0.99
	BSA(μg/mL)	A595
	0	0
	20	0.213
	40	0.388
	60	0.535
	80	0.671
	100	0.798
BT-without MTGase	The supernatants of P0 and P1 were diluted 20 times for determing, and the P2 and P3 were diluted 80 times.
	P0	P1	P2-1	P2-5	P2-25	P2-60	P3-1	P3-5	P3-30	P3-120
A595	0.169	0.168	0.582	0.574	0.58	0.535	0.442	0.444	0.406	0.413
	0.161	0.167	0.577	0.585	0.575	0.544	0.43	0.428	0.411	0.421
	0.174	0.171	0.589	0.609	0.56	0.533	0.431	0.438	0.424	0.404
	16.2658	16.1392	68.5443	67.5316	68.2911	62.5949	50.8228	51.0759	46.2658	47.1519
	15.2532	16.0127	67.9114	68.9241	67.6582	63.7342	49.3038	49.0506	46.8987	48.1646
	16.8987	16.519	69.4304	71.962	65.7595	62.3418	49.4304	50.3165	48.5443	46.0127
Soluble protein content(μg/mL)	325.316	322.785	5483.54	5402.53	5463.29	5007.59	4065.82	4086.08	3701.27	3772.15
	305.063	320.253	5432.91	5513.92	5412.66	5098.73	3944.3	3924.05	3751.9	3853.16
	337.975	330.38	5554.43	5756.96	5260.76	4987.34	3954.43	4025.32	3883.54	3681.01
Soluble protein content(mg/mL)	0.325316	0.322785	5.48354	5.40253	5.46329	5.00759	4.06582	4.08608	3.70127	3.77215
	0.305063	0.320253	5.43291	5.51392	5.41266	5.09873	3.9443	3.92405	3.7519	3.85316
	0.337975	0.33038	5.55443	5.75696	5.26076	4.98734	3.95443	4.02532	3.88354	3.68101
Average	0.322785	0.324473	5.4903	5.55781	5.3789	5.03122	3.98819	4.01181	3.7789	3.76878
Standard Deviation	0.0166011	0.00527004	0.0610401	0.181244	0.105401	0.0593364	0.0674261	0.0818522	0.0940919	0.0861256
BT-with MTGase	The supernatants of P0 and P1 were diluted 20 times for determing, and the P2 and P3 were diluted 40 times.
	P0	P1	P2-1	P2-5	P2-25	P2-60	P3-1	P3-5	P3-30	P3-120
A595	0.166	0.169	0.51	0.495	0.538	0.646	0.554	0.554	0.587	0.602
	0.156	0.165	0.512	0.511	0.53	0.662	0.562	0.547	0.589	0.583
	0.16	0.173	0.52	0.505	0.525	0.655	0.549	0.558	0.58	0.589
	15.8861	16.2658	59.4304	57.5316	62.9747	76.6456	65	65	69.1772	71.0759
	14.6203	15.7595	59.6835	59.557	61.962	78.6709	66.0127	64.1139	69.4304	68.6709
	15.1266	16.7722	60.6962	58.7975	61.3291	77.7848	64.3671	65.5063	68.2911	69.4304
Soluble protein content(μg/mL)	317.722	325.316	2377.22	2301.27	2518.99	3065.82	2600	2600	2767.09	2843.04
	292.405	315.19	2387.34	2382.28	2478.48	3146.84	2640.51	2564.56	2777.22	2746.84
	302.532	335.443	2427.85	2351.9	2453.16	3111.39	2574.68	2620.25	2731.65	2777.22
Soluble protein content(mg/mL)	0.317722	0.325316	2.37722	2.30127	2.51899	3.06582	2.6	2.6	2.76709	2.84304
	0.292405	0.31519	2.38734	2.38228	2.47848	3.14684	2.64051	2.56456	2.77722	2.74684
	0.302532	0.335443	2.42785	2.3519	2.45316	3.11139	2.57468	2.62025	2.73165	2.77722
Average	0.304219	0.325316	2.39747	2.34515	2.48354	3.10802	2.60506	2.59494	2.75865	2.78903
Standard Deviation	0.0127423	0.0101266	0.0267924	0.0409261	0.0332022	0.0406117	0.0332022	0.0281912	0.0239282	0.0491774

## Sheet: Digestibility
Digestibility determined by pH drop methods
Digestibility= 210.46-18.10X (X: the change in pH after 10 min of digestion)
BT-without MTGase
The initial PH	The pH after 10 min of digestion
7.96	7.47
8.01	7.55
8.02	7.49
	Digesitibility
	75.253
	73.805
	74.891
Average	74.6497
Standard Deviation	0.753563
BT-with MTGase
The initial PH	The pH after 10 min of digestion
8.02	7.6
8.01	7.66
8.04	7.65
	72.84
	71.754
	71.935
Average	72.1763
Standard Deviation	0.581834

## Sheet: The degree of hydrolysis
The degree of hydrolysis
The standand curve	y=0.7798x+0.0492 R2=1
	Ser(mmol/L)	A340
	0	0.048
	0.2379	0.234
	0.4758	0.4235
	0.7136	0.606
	0.9515	0.7895
BT-without MTGase	The supernatants of all samples were diluted 40 times for determing.
		P2-1	P2-60	P3-1	P3-120
	A340	0.371	0.396	0.429	0.493
		0.374	0.402	0.423	0.49
		0.386	0.413	0.431	0.484
	Equivalent to the amount of serine (mmol/L)	0.41267	0.444729	0.487048	0.56912
		0.416517	0.452424	0.479354	0.565273
		0.431906	0.46653	0.489613	0.557579
	The quantity of serine in per gram of protein (mmol/L)	1.50062	1.6172	1.77108	2.06953
		1.51461	1.64518	1.7431	2.05554
		1.57057	1.69647	1.78041	2.02756
	DH(%)	0.143684	0.158903	0.178993	0.217954
		0.14551	0.162556	0.17534	0.216128
		0.152815	0.169252	0.18021	0.212475
Average		0.147336	0.16357	0.178181	0.215519
Standard Deviation		0.00483199	0.00524864	0.00253452	0.00278975
BT-with MTGase	The supernatants of all samples were diluted 40 times for determing.
		P2-1	P2-60	P3-1	P3-120
	A340	0.238	0.327	0.364	0.403
		0.243	0.331	0.37	0.408
		0.236	0.313	0.361	0.397
	Equivalent to the amount of serine (mmol/L)	0.242113	0.356245	0.403693	0.453706
		0.248525	0.361375	0.411388	0.460118
		0.239549	0.338292	0.399846	0.446012
	The quantity of serine in per gram of protein (mmol/L)	0.880412	1.29544	1.46798	1.64984
		0.903728	1.31409	1.49595	1.67316
		0.871086	1.23015	1.45399	1.62186
	DH(%)	0.062717	0.116898	0.139422	0.163165
		0.0657609	0.119333	0.143075	0.166208
		0.0614995	0.108375	0.137596	0.159512
Average		0.0633258	0.114869	0.140031	0.162962
Standard Deviation		0.00219496	0.0057539	0.00278975	0.00335286
